# Supplementary material
Source: PubMed Central journal article supplement (PMC1323213)
Supplement: pnas_0509643102_2.pdf [file pnas_0509643102_2.pdf]

**Table 1: Conservation of glomeruli between individuals and GAL4 lines**

| Glomerulus | Position and size                                      | OK107   | GH146   | NP225         |                                                     | n-syb-GFP consensus | n-syb-GFP exceptions | n-syb-GFP consensus | n-syb-GFP exceptions |
|------------|--------------------------------------------------------|---------|---------|---------------|-----------------------------------------------------|---------------------|----------------------|---------------------|----------------------|
|            |                                                        | (n = 5) | (n = 5) | (n = 9)       | (n = 9)                                             |                     |                      |                     |                      |
| <b>D1</b>  | Large, dorsalmost                                      | 5/5     | 5/5     | Strong        |                                                     | 9/9                 | Med/Strong           | Weak (1/9)          |                      |
| <b>D2</b>  | Posterior medial to D1                                 | 5/5     | 5/5     | Weak/Med      |                                                     | 9/9                 | Negative             | Weak (1/9)          | Strong (1/9)         |
| <b>D3</b>  | Anterior medial to D2, shallow                         | 5/5     | 5/5     | Med           |                                                     | 9/9                 | Med/Strong           | Weak (2/9)          |                      |
| <b>D4</b>  | Posterior medial to D3; sometimes not distinct from D5 | 5/5     | 5/5     | Med/Strong    |                                                     | 9/9                 | Med/Strong           |                     |                      |
| <b>D5</b>  | Anterior medial to D3; sometimes not distinct from D4  | 5/5     | 5/5     | Med/Strong    |                                                     | 9/9                 | Med/Strong           |                     |                      |
| <b>L1</b>  | Most dorsoposterial                                    | 5/5     | 5/5     | Med           |                                                     | 9/9                 | Med/Strong           | Negative (1/9)      |                      |
| <b>L2</b>  | Anterior to L1, lateral to D1                          | 5/5     | 5/5     | Med           |                                                     | 9/9                 | Med/Strong           |                     |                      |
| <b>L3</b>  | Anterior to L2 Complex                                 | 5/5     | 5/5     | Med/Strong    |                                                     | 9/9                 | Med/Strong           |                     |                      |
| <b>L4</b>  | Most posterior and ventral, ventral to L1              | 5/5     | 5/5     | Strong        |                                                     | 9/9                 | Med/Strong           |                     |                      |
| <b>L5</b>  | Anterior to L1                                         | 5/5     | 5/5     | Negative      |                                                     | 9/9                 | Negative             |                     |                      |
| <b>L6</b>  | Anterior to L5                                         | 5/5     | 5/5     | Med/Strong    |                                                     | 9/9                 | Negative             |                     |                      |
| <b>L7</b>  | Anterior and/or ventral to L3                          | 4/5     | 5/5     | Negative      |                                                     | 8/9                 | Negative             |                     |                      |
| <b>L8</b>  | Lateral to V5, anterior to V3                          | 4/5     | 4/5     | Med           |                                                     | 9/9                 | Med/Strong           |                     |                      |
| <b>A1</b>  | Medial to A4 Complex                                   | 5/5     | 5/5     | Med/Strong    |                                                     | 9/9                 | Med/Strong           |                     |                      |
| <b>A2</b>  | Ventral to A1                                          | No      | 5/5     | Negative      |                                                     | 9/9                 | Negative             |                     |                      |
| <b>A3</b>  | Ventral to A4                                          | 5/5     | 5/5     | Strong        |                                                     | 9/9                 | Strong               |                     |                      |
| <b>A4</b>  | Most anterior medial                                   | 5/5     | 5/5     | Med/Strong    |                                                     | 9/9                 | Med/Strong           | Weak (1/9)          |                      |
| <b>M1</b>  | Ventral to D4 and D5, between axon tract A and B       | 5/5     | 5/5     | Negative/Weak | Strong (1/5); Dorsal Negative, ventral Strong (1/5) | 9/9                 | Weak/Med             | Strong (1/9)        |                      |
| <b>M2</b>  | Anterior to axon tract A                               | 5/5     | 5/5     | Negative      | Strong (1/5)                                        | 9/9                 | Strong               |                     |                      |
| <b>M3</b>  | Anterior to M1                                         | 5/5     | 5/5     | Med/Strong    |                                                     | 9/9                 | Negative             | Weak (1/9)          |                      |
| <b>M4</b>  | Between V2 and V4, ventral to M2                       | 5/5     | 4/5     | Strong        |                                                     | 4/9                 | Varies               |                     |                      |
| <b>M5</b>  | Between axon tract C/D or posterior medial to L1       | 2/5     | 2/5     | Negative/Weak |                                                     | 1/9                 | Strong               |                     |                      |
| <b>I1</b>  | Internal to L6 and L1                                  | 5/5     | 3/5     | Med/Strong    |                                                     | 6/9                 | Med                  |                     |                      |
| <b>I2</b>  | Internal to A1                                         | 4/5     | 5/5     | Negative      |                                                     | 5/9                 | Med/Weak             |                     |                      |

| Glomerulus | Position and size                                  | OK107   | GH146   | NP225               |                      |       |                     |                      |
|------------|----------------------------------------------------|---------|---------|---------------------|----------------------|-------|---------------------|----------------------|
|            |                                                    | (n = 5) | (n = 5) | (n = 9)             | (n = 9)              |       |                     |                      |
|            |                                                    | Found   | Found   | n-syb-GFP consensus | n-syb-GFP exceptions | Found | n-syb-GFP consensus | n-syb-GFP exceptions |
| <b>I3</b>  | Internal to L5 or L6                               | 5/5     | 5/5     | Med                 |                      | 9/9   | Negative            |                      |
| <b>I4</b>  | Internal to L7                                     | 5/5     | 5/5     | Med                 |                      | 9/9   | Negative            | Weak (1/9)           |
| <b>I5</b>  | Ventral to D1                                      | 4/5     | No      |                     |                      | 7/9   | Med/Strong          |                      |
| <b>I6</b>  | Medial to I5                                       | No      | No      |                     |                      | 9/9   | Strong              |                      |
| <b>I7</b>  | Interior to M1                                     | 2/5     | No      |                     |                      | No    |                     |                      |
| <b>V1</b>  | Lateral to axon tract C/D, medial to glomerulus L4 | 5/5     | 5/5     | Strong              |                      | 9/9   | Med                 | Negative (2/9)       |
| <b>V2</b>  | Lateral to axon tract A/B                          | 5/5     | 5/5     | Negative            |                      | 8/9   | Negative            |                      |
| <b>V3</b>  | Lateral to V2, anterior to V6                      | 4/5     | 4/5     | Strong              |                      | 7/9   | Med/Strong          |                      |
| <b>V4</b>  | Posterior to A3                                    | 4/5     | 4/5     | Negative            |                      | 9/9   | Negative            |                      |
| <b>V5</b>  | Lateral to M4, anterior to V3                      | 4/5     | 3/5     | Med                 |                      | 8/9   | Med/Strong          |                      |
| <b>V6</b>  | Anterior lateral to V1                             | 5/5     | 4/5     | Negative            |                      | 7/9   | Negative            |                      |
| <b>V7</b>  | Anterior to M4                                     | 4/5     | 4/5     | Negative            |                      | 2/9   | Negative            |                      |
| <b>V8</b>  | Anterior to V6                                     | No      | 3/5     | Negative            |                      | 1/9   | Negative            |                      |

For each glomerulus, the usual position and size is summarized. The “Found” column summarizes the number of calyces in which the glomerulus is found, out of the total number examined for that GAL4 line; “No” means that it was not found. The “n-syb-GFP consensus” columns show the usual levels of n-syb-GFP staining in that glomerulus, relative to other glomeruli in the same genotype. The “n-syb-GFP exceptions” columns show exceptions to the normal pattern of n-syb-GFP staining, with the number of calyces in which that exception was found, out of the total number of calyces examined.
