# Supplementary material
Source: PubMed Central journal article supplement (PMC1323213)
Supplement: pnas_0509643102_3.pdf [file pnas_0509643102_3.pdf]

| AA | AB | AC | AD    | AE | AF | AG | AH | AI | AJ | AK | AL | AM | AN | AO | AP | AQ | AR | AS | AT | AU | AV | AW    | AX | AY | AZ | BA | BB | BC |
|----|----|----|-------|----|----|----|----|----|----|----|----|----|----|----|----|----|----|----|----|----|----|-------|----|----|----|----|----|----|
| 21 | 22 | 23 |       |    | 24 | 25 | 26 | 27 | 28 | 29 | 30 | 31 | 32 | 33 | 34 | 35 | 36 | 37 | 38 | 39 | 40 |       |    | 41 | 42 | 43 | 44 | 45 |
| M  | M  | F  |       |    | M  | M  | M  | M  | M  | M  | F  | F  | F  | F  | F  | F  | F  | F  | F  | F  | F  |       |    | F  | F  | M  | M  | M  |
| C  | C  | C  | SUM C |    | B  | B  | B  | B  | B  | B  | B  | B  | B  | B  | B  | B  | B  | B  | B  | B  | B  | SUM B |    | A  | A  | A  | A  | A  |
|    |    | 1  | 1     | 4  |    |    |    |    |    | 1  | 1  |    | 1  |    |    | 1  |    |    |    |    |    | 4     |    | 1  | 1  |    | 1  |    |
|    |    |    |       | 0  |    |    |    |    |    |    |    |    |    |    |    |    |    |    |    |    | 1  |       | 1  |    |    |    |    |    |
|    |    |    |       | 1  | 1  | 1  | 1  |    |    |    |    |    |    |    |    |    | 1  |    |    |    |    | 4     |    |    |    |    | 1  |    |
|    |    | 1  |       | 2  |    |    |    |    |    |    |    |    |    |    |    |    |    |    | 1  |    |    | 1     |    |    |    |    |    |    |
|    |    | 1  |       | 3  |    |    |    |    |    | 1  |    |    |    | 1  |    |    |    | 1  |    | 1  |    | 3     |    |    |    | 1  |    |    |
|    |    | 1  |       | 2  |    |    | 1  |    |    | 1  |    |    |    |    |    |    |    |    |    |    | 1  | 6     |    |    |    |    |    |    |
|    |    |    |       | 0  |    | 1  |    |    |    |    | 1  |    |    |    |    | 1  | 1  | 1  |    |    | 1  | 3     |    |    |    | 1  |    |    |
|    |    |    |       | 1  |    | 1  | 1  |    | 1  |    | 1  |    | 1  |    |    | 1  | 1  |    |    |    | 1  | 6     |    | 1  | 1  |    | 1  |    |
| 1  |    |    |       | 4  |    |    |    |    |    |    |    | 1  |    |    | 1  | 1  | 1  |    | 1  |    | 5  |       |    |    |    |    |    |    |
|    |    |    |       | 0  |    | 1  |    |    |    |    |    |    |    |    |    |    | 1  |    |    |    |    | 2     |    |    |    |    |    |    |
|    | 1  |    |       | 3  | 1  |    |    |    | 1  |    |    |    |    |    |    |    |    |    |    | 1  | 1  | 4     |    |    |    |    | 1  |    |
|    | 1  |    |       | 2  | 1  |    | 1  |    |    |    |    |    | 1  |    |    |    |    |    |    | 1  |    | 4     |    |    |    | 1  |    |    |
| 1  |    |    |       | 4  |    |    | 1  |    | 1  | 1  |    |    |    | 1  |    |    |    |    |    |    |    | 3     |    |    |    | 1  |    |    |
| 1  |    |    | 1     | 5  | 1  |    |    |    | 1  | 1  |    | 1  |    |    |    | 1  |    |    |    | 1  |    | 5     |    | 1  | 1  | 1  |    |    |
| 1  |    |    | 1     | 4  |    | 1  |    |    |    |    | 1  |    | 1  |    |    |    |    |    |    |    |    | 4     |    |    |    | 1  |    |    |
|    |    |    |       | 0  |    |    |    |    | 1  |    |    |    |    |    |    | 1  |    |    |    |    |    | 2     |    |    |    |    |    | 1  |
|    |    | 1  |       | 2  |    |    |    | 1  | 1  | 1  |    |    | 1  |    |    |    |    |    |    |    | 1  | 2     |    |    |    |    |    |    |
|    |    |    |       | 1  |    | 1  |    | 1  | 1  | 1  |    |    | 1  |    |    |    |    |    | 1  |    |    | 7     |    | 1  |    | 1  | 1  |    |
|    |    |    |       | 0  |    |    | 1  |    |    |    |    |    |    |    |    |    |    |    |    |    |    | 1     |    |    | 1  |    |    |    |
|    |    | 1  |       | 4  |    |    |    |    |    |    | 1  |    |    |    |    |    |    |    |    |    | 1  | 2     |    |    |    | 1  |    |    |
| 1  |    |    |       | 3  |    |    |    |    |    |    |    |    |    |    |    |    | 1  |    |    |    |    | 1     |    |    |    | 1  |    |    |
|    |    |    |       | 1  |    |    |    |    | 1  |    |    |    |    |    |    |    |    |    | 1  |    |    | 0     |    |    |    |    | 1  |    |
|    |    |    |       | 0  |    |    |    |    |    | 1  |    |    |    |    |    |    |    |    | 1  |    |    | 4     |    |    |    |    |    |    |
|    |    |    | 1     | 2  |    |    |    |    |    |    | 1  |    |    |    |    |    |    |    |    |    |    | 0     |    |    |    |    |    |    |
|    |    |    |       | 0  | 1  |    |    |    |    |    |    | 1  |    |    |    |    |    |    | 1  |    |    | 5     |    |    | 1  |    |    |    |
|    |    |    |       | 2  |    |    |    |    |    |    |    |    |    |    |    |    |    |    |    |    |    | 1     |    |    |    |    |    |    |
|    |    |    |       | 0  |    |    |    | 1  |    |    |    |    |    |    |    | 1  |    |    |    |    |    | 2     |    |    |    |    | 1  |    |
| 1  |    |    | 1     | 3  |    |    |    |    | 1  |    |    | 1  | 1  |    | 1  |    |    | 1  |    |    |    | 5     |    |    |    |    | 1  |    |
|    |    |    |       | 1  |    | 1  |    |    |    |    |    |    | 1  | 1  | 1  |    |    |    |    |    |    | 3     |    |    |    |    |    |    |
|    |    |    |       | 1  |    |    |    |    |    |    |    |    |    | 1  |    |    |    |    |    |    |    | 0     |    |    |    |    |    |    |
| 1  |    |    | 1     | 4  | 1  |    |    |    |    |    |    |    |    |    |    |    |    |    |    |    |    | 1     |    |    |    |    |    |    |
|    |    |    |       | 2  |    |    |    |    |    |    |    |    |    |    |    |    |    |    |    |    |    | 0     |    |    |    |    |    |    |
| 6  | 7  | 7  | 62    |    | 6  | 7  | 6  | 4  | 6  | 6  | 5  | 4  | 6  | 5  | 6  | 5  | 6  | 6  | 4  | 6  | 5  | 93    |    | 7  | 5  | 7  | 7  | 2  |

| BD | BE | BF | BG | BH | BI | BJ | BK | BL    | BM | BN  | BO  | BP           | BQ        | BR | BS                                                                                       | BT       | BU | BV  | BW    | BX    | BY    | BZ    | CA    | CB           | CC        | CD | CE |
|----|----|----|----|----|----|----|----|-------|----|-----|-----|--------------|-----------|----|------------------------------------------------------------------------------------------|----------|----|-----|-------|-------|-------|-------|-------|--------------|-----------|----|----|
| 46 | 46 | 48 | 49 | 50 | 51 | 52 | 53 |       |    | 54  | 55  |              |           |    | Starting here are contingency tables for $\chi^2$ comparisons of different groups of KCs |          |    |     |       |       |       |       |       |              |           |    |    |
| M  | M  | M  | M  | M  | M  | F  | F  |       |    | M   | F   |              |           |    | Compare glomeruli innervated by progeny of different neuroblasts                         |          |    |     |       |       |       |       |       |              |           |    |    |
| A  | A  | A  | A  | A  | A  | A  | A  | SUM A |    | C/D | B/C | TOTAL        |           |    | Observed                                                                                 | Expected |    |     |       |       |       |       |       |              |           |    |    |
|    |    |    |    |    |    |    |    |       |    |     |     |              |           |    | D                                                                                        | C        | B  | A   | SUM   | D     | C     | B     | A     | SUM          |           |    |    |
|    |    |    |    |    |    |    | 1  | 4     |    |     | 1   | 17           | <b>D1</b> |    | 4                                                                                        | 4        | 4  | 4   | 16    | 3.934 | 3.252 | 4.879 | 3.934 | 16           | <b>D1</b> |    |    |
|    |    |    |    |    |    |    |    | 1     |    | 1   | 3   | <b>D2</b>    |           | 0  | 0                                                                                        | 1        | 1  | 2   | 0.492 | 0.407 | 0.61  | 0.492 | 2     | <b>D2</b>    |           |    |    |
| 1  |    |    |    |    | 1  | 1  |    | 4     |    |     | 11  | <b>D3</b>    |           | 2  | 1                                                                                        | 4        | 4  | 11  | 2.705 | 2.236 | 3.354 | 2.705 | 11    | <b>D3</b>    |           |    |    |
|    |    |    |    |    |    |    |    | 1     |    |     | 6   | <b>D4</b>    |           | 2  | 2                                                                                        | 1        | 1  | 6   | 1.475 | 1.22  | 1.83  | 1.475 | 6     | <b>D4</b>    |           |    |    |
|    |    | 1  | 1  | 1  |    |    | 1  | 4     |    |     | 10  | <b>D5</b>    |           | 0  | 3                                                                                        | 3        | 4  | 10  | 2.459 | 2.033 | 3.049 | 2.459 | 10    | <b>D5</b>    |           |    |    |
|    |    |    |    |    | 1  |    |    | 1     |    | 1   | 16  | <b>L1</b>    |           | 6  | 2                                                                                        | 6        | 1  | 15  | 3.689 | 3.049 | 4.574 | 3.689 | 15    | <b>L1</b>    |           |    |    |
|    |    | 1  | 1  |    | 1  | 1  |    | 5     |    |     | 12  | <b>L2</b>    |           | 4  | 0                                                                                        | 3        | 5  | 12  | 2.951 | 2.439 | 3.659 | 2.951 | 12    | <b>L2</b>    |           |    |    |
| 1  | 1  |    |    |    | 1  | 1  |    | 7     |    |     | 1   | 21           | <b>L3</b> |    | 6                                                                                        | 1        | 6  | 7   | 20    | 4.918 | 4.066 | 6.098 | 4.918 | 20           | <b>L3</b> |    |    |
|    |    |    |    |    | 1  |    |    | 2     |    | 1   | 14  | <b>L4</b>    |           | 2  | 4                                                                                        | 5        | 2  | 13  | 3.197 | 2.643 | 3.964 | 3.197 | 13    | <b>L4</b>    |           |    |    |
|    |    |    |    |    | 1  |    |    | 1     |    |     | 6   | <b>L5</b>    |           | 3  | 0                                                                                        | 2        | 1  | 6   | 1.475 | 1.22  | 1.83  | 1.475 | 6     | <b>L5</b>    |           |    |    |
|    |    |    |    |    | 1  |    |    | 1     |    |     | 10  | <b>L6</b>    |           | 2  | 3                                                                                        | 4        | 1  | 10  | 2.459 | 2.033 | 3.049 | 2.459 | 10    | <b>L6</b>    |           |    |    |
|    |    |    | 1  |    |    |    |    | 2     |    |     | 9   | <b>L7</b>    |           | 1  | 2                                                                                        | 4        | 2  | 9   | 2.213 | 1.83  | 2.744 | 2.213 | 9     | <b>L7</b>    |           |    |    |
|    |    |    |    |    |    |    |    | 1     |    |     | 11  | <b>L8</b>    |           | 3  | 4                                                                                        | 3        | 1  | 11  | 2.705 | 2.236 | 3.354 | 2.705 | 11    | <b>L8</b>    |           |    |    |
| 1  |    |    | 1  |    |    |    | 1  | 6     |    | 1   | 25  | <b>A1/A2</b> |           | 8  | 5                                                                                        | 5        | 6  | 24  | 5.902 | 4.879 | 7.318 | 5.902 | 24    | <b>A1/A2</b> |           |    |    |
|    |    |    |    |    | 1  | 1  |    | 3     |    | 1   | 15  | <b>A3</b>    |           | 2  | 4                                                                                        | 4        | 3  | 13  | 3.197 | 2.643 | 3.964 | 3.197 | 13    | <b>A3</b>    |           |    |    |
|    |    |    |    |    |    |    |    | 2     |    |     | 10  | <b>A4</b>    |           | 5  | 0                                                                                        | 2        | 2  | 9   | 2.213 | 1.83  | 2.744 | 2.213 | 9     | <b>A4</b>    |           |    |    |
|    |    |    |    |    |    |    | 1  | 1     |    |     | 7   | <b>M1</b>    |           | 2  | 2                                                                                        | 2        | 1  | 7   | 1.721 | 1.423 | 2.134 | 1.721 | 7     | <b>M1</b>    |           |    |    |
|    |    |    |    | 1  | 1  |    |    | 2     |    |     | 6   | <b>M2</b>    |           | 1  | 1                                                                                        | 2        | 2  | 6   | 1.475 | 1.22  | 1.83  | 1.475 | 6     | <b>M2</b>    |           |    |    |
| 1  |    |    | 1  | 1  |    |    |    | 4     |    | 1   | 16  | <b>M3</b>    |           | 3  | 1                                                                                        | 7        | 4  | 15  | 3.689 | 3.049 | 4.574 | 3.689 | 15    | <b>M3</b>    |           |    |    |
|    |    |    |    |    |    |    |    | 3     |    |     | 5   | <b>M4</b>    |           | 1  | 0                                                                                        | 1        | 3  | 5   | 1.23  | 1.016 | 1.525 | 1.23  | 5     | <b>M4</b>    |           |    |    |
|    |    | 1  | 1  |    |    |    |    | 3     |    |     | 11  | <b>I1</b>    |           | 2  | 4                                                                                        | 2        | 3  | 11  | 2.705 | 2.236 | 3.354 | 2.705 | 11    | <b>I1</b>    |           |    |    |
| 1  |    |    |    |    |    |    |    | 2     |    |     | 7   | <b>I2</b>    |           | 0  | 3                                                                                        | 1        | 2  | 6   | 1.475 | 1.22  | 1.83  | 1.475 | 6     | <b>I2</b>    |           |    |    |
|    |    |    |    |    |    |    |    | 1     |    |     | 2   | <b>I3</b>    |           | 0  | 1                                                                                        | 0        | 1  | 2   | 0.492 | 0.407 | 0.61  | 0.492 | 2     | <b>I3</b>    |           |    |    |
|    |    |    |    | 1  |    | 1  |    | 2     |    |     | 6   | <b>I4</b>    |           | 0  | 0                                                                                        | 4        | 2  | 6   | 1.475 | 1.22  | 1.83  | 1.475 | 6     | <b>I4</b>    |           |    |    |
|    |    |    |    |    |    |    |    | 0     |    |     | 2   | <b>I5</b>    |           | 0  | 2                                                                                        | 0        | 0  | 2   | 0.492 | 0.407 | 0.61  | 0.492 | 2     | <b>I5</b>    |           |    |    |
|    |    |    |    |    |    |    |    | 1     |    |     | 3   | <b>I6</b>    |           | 1  | 0                                                                                        | 1        | 1  | 3   | 0.738 | 0.61  | 0.915 | 0.738 | 3     | <b>I6</b>    |           |    |    |
|    |    | 1  | 1  |    |    |    |    | 2     |    | 1   | 15  | <b>V1</b>    |           | 5  | 2                                                                                        | 5        | 2  | 14  | 3.443 | 2.846 | 4.269 | 3.443 | 14    | <b>V1</b>    |           |    |    |
| 1  |    |    |    |    |    |    | 1  | 3     |    |     | 5   | <b>V2</b>    |           | 0  | 0                                                                                        | 2        | 3  | 5   | 1.23  | 1.016 | 1.525 | 1.23  | 5     | <b>V2</b>    |           |    |    |
| 1  |    |    | 1  |    |    | 1  | 1  | 5     |    |     | 1   | 20           | <b>V3</b> |    | 6                                                                                        | 3        | 5  | 5   | 19    | 4.672 | 3.862 | 5.793 | 4.672 | 19           | <b>V3</b> |    |    |
|    |    |    |    |    |    |    |    | 0     |    |     | 7   | <b>V4</b>    |           | 3  | 1                                                                                        | 3        | 0  | 7   | 1.721 | 1.423 | 2.134 | 1.721 | 7     | <b>V4</b>    |           |    |    |
|    |    |    |    |    |    |    |    | 0     |    |     | 2   | <b>V5</b>    |           | 1  | 1                                                                                        | 0        | 0  | 2   | 0.492 | 0.407 | 0.61  | 0.492 | 2     | <b>V5</b>    |           |    |    |
|    |    |    | 1  |    |    |    |    | 1     |    | 1   | 7   | <b>V6</b>    |           | 0  | 4                                                                                        | 1        | 1  | 6   | 1.475 | 1.22  | 1.83  | 1.475 | 6     | <b>V6</b>    |           |    |    |
|    |    |    |    |    |    |    |    | 0     |    |     | 2   | <b>V8</b>    |           | 0  | 2                                                                                        | 0        | 0  | 2   | 0.492 | 0.407 | 0.61  | 0.492 | 2     | <b>V8</b>    |           |    |    |
| 7  | 5  | 5  | 6  | 6  | 5  | 7  | 6  | 75    |    | 7   | 7   |              |           | 75 | 62                                                                                       | 93       | 75 | 305 | 75    | 62    | 93    | 75    | 305   |              |           |    |    |

p = 0.4698 N.S.

CF CG CH CI CJ CK CL CM CN CO CP CQ CR CS CT CU CV CW CX CY CZ DA DB DC DD

**Male-Female comparison**

| Observed |        |     | Expected |        |     |
|----------|--------|-----|----------|--------|-----|
| Male     | Female | SUM | Male     | Female | SUM |
| 7        | 10     | 17  | 7.9937   | 9.0063 | 17  |
| 1        | 2      | 3   | 1.4107   | 1.5893 | 3   |
| 7        | 4      | 11  | 5.1724   | 5.8276 | 11  |
| 3        | 3      | 6   | 2.8213   | 3.1787 | 6   |
| 6        | 4      | 10  | 4.7022   | 5.2978 | 10  |
| 9        | 7      | 16  | 7.5235   | 8.4765 | 16  |
| 6        | 6      | 12  | 5.6426   | 6.3574 | 12  |
| 10       | 11     | 21  | 9.8746   | 11.125 | 21  |
| 4        | 10     | 14  | 6.5831   | 7.4169 | 14  |
| 3        | 3      | 6   | 2.8213   | 3.1787 | 6   |
| 6        | 4      | 10  | 4.7022   | 5.2978 | 10  |
| 7        | 2      | 9   | 4.232    | 4.768  | 9   |
| 6        | 5      | 11  | 5.1724   | 5.8276 | 11  |
| 11       | 14     | 25  | 11.755   | 13.245 | 25  |
| 7        | 8      | 15  | 7.0533   | 7.9467 | 15  |
| 3        | 7      | 10  | 4.7022   | 5.2978 | 10  |
| 2        | 5      | 7   | 3.2915   | 3.7085 | 7   |
| 5        | 1      | 6   | 2.8213   | 3.1787 | 6   |
| 11       | 5      | 16  | 7.5235   | 8.4765 | 16  |
| 3        | 2      | 5   | 2.3511   | 2.6489 | 5   |
| 3        | 8      | 11  | 5.1724   | 5.8276 | 11  |
| 3        | 4      | 7   | 3.2915   | 3.7085 | 7   |
| 1        | 1      | 2   | 0.9404   | 1.0596 | 2   |
| 2        | 4      | 6   | 2.8213   | 3.1787 | 6   |
| 0        | 2      | 2   | 0.9404   | 1.0596 | 2   |
| 0        | 3      | 3   | 1.4107   | 1.5893 | 3   |
| 5        | 10     | 15  | 7.0533   | 7.9467 | 15  |
| 3        | 2      | 5   | 2.3511   | 2.6489 | 5   |
| 7        | 13     | 20  | 9.4044   | 10.596 | 20  |
| 3        | 4      | 7   | 3.2915   | 3.7085 | 7   |
| 0        | 2      | 2   | 0.9404   | 1.0596 | 2   |
| 5        | 2      | 7   | 3.2915   | 3.7085 | 7   |
| 1        | 1      | 2   | 0.9404   | 1.0596 | 2   |
| 150      | 169    | 319 | 150      | 169    | 319 |

p = 0.5769 N.S.

**Comparisons to the right of here look for preferential association or avoidance of pairs of glomeruli in same KC**

| Observed |         |     | Expected |         |     |
|----------|---------|-----|----------|---------|-----|
| A1/2     | nonA1/2 | SUM | A1/2     | nonA1/2 | SUM |
| 7        | 10      | 17  | 7.22789  | 9.77211 | 17  |
| 2        | 1       | 3   | 1.27551  | 1.72449 | 3   |
| 3        | 8       | 11  | 4.67687  | 6.32313 | 11  |
| 4        | 2       | 6   | 2.55102  | 3.44898 | 6   |
| 4        | 6       | 10  | 4.2517   | 5.7483  | 10  |
| 7        | 9       | 16  | 6.80272  | 9.19728 | 16  |
| 2        | 10      | 12  | 5.10204  | 6.89796 | 12  |
| 9        | 12      | 21  | 8.92857  | 12.0714 | 21  |
| 6        | 8       | 14  | 5.95238  | 8.04762 | 14  |
| 2        | 4       | 6   | 2.55102  | 3.44898 | 6   |
| 2        | 8       | 10  | 4.2517   | 5.7483  | 10  |
| 4        | 5       | 9   | 3.82653  | 5.17347 | 9   |
| 4        | 7       | 11  | 4.67687  | 6.32313 | 11  |
| 6        | 9       | 15  | 6.37755  | 8.62245 | 15  |
| 5        | 5       | 10  | 4.2517   | 5.7483  | 10  |
| 4        | 3       | 7   | 2.97619  | 4.02381 | 7   |
| 1        | 5       | 6   | 2.55102  | 3.44898 | 6   |
| 7        | 9       | 16  | 6.80272  | 9.19728 | 16  |
| 4        | 1       | 5   | 2.12585  | 2.87415 | 5   |
| 6        | 5       | 11  | 4.67687  | 6.32313 | 11  |
| 2        | 5       | 7   | 2.97619  | 4.02381 | 7   |
| 1        | 1       | 2   | 0.85034  | 1.14966 | 2   |
| 0        | 6       | 6   | 2.55102  | 3.44898 | 6   |
| 2        | 0       | 2   | 0.85034  | 1.14966 | 2   |
| 2        | 1       | 3   | 1.27551  | 1.72449 | 3   |
| 6        | 9       | 15  | 6.37755  | 8.62245 | 15  |
| 3        | 2       | 5   | 2.12585  | 2.87415 | 5   |
| 12       | 8       | 20  | 8.5034   | 11.4966 | 20  |
| 2        | 5       | 7   | 2.97619  | 4.02381 | 7   |
| 0        | 2       | 2   | 0.85034  | 1.14966 | 2   |
| 4        | 3       | 7   | 2.97619  | 4.02381 | 7   |
| 2        | 0       | 2   | 0.85034  | 1.14966 | 2   |
| 125      | 169     | 294 | 125      | 169     | 294 |

p = 0.46 N.S.

| Observed |        |     | Expected |        |     |
|----------|--------|-----|----------|--------|-----|
| L3       | non-L3 | SUM | L3       | non-L3 | SUM |
| 8        | 9      | 17  | 5.9899   | 11.01  | 17  |
| 2        | 1      | 3   | 1.057    | 1.943  | 3   |
| 6        | 5      | 11  | 3.8758   | 7.1242 | 11  |
| 0        | 6      | 6   | 2.1141   | 3.8859 | 6   |
| 2        | 8      | 10  | 3.5235   | 6.4765 | 10  |
| 5        | 11     | 16  | 5.6376   | 10.362 | 16  |
| 6        | 6      | 12  | 4.2282   | 7.7718 | 12  |
| 5        | 9      | 14  | 4.9329   | 9.0671 | 14  |
| 3        | 3      | 6   | 2.1141   | 3.8859 | 6   |
| 3        | 7      | 10  | 3.5235   | 6.4765 | 10  |
| 1        | 8      | 9   | 3.1711   | 5.8289 | 9   |
| 4        | 7      | 11  | 3.8758   | 7.1242 | 11  |
| 9        | 16     | 25  | 8.8087   | 16.191 | 25  |
| 4        | 11     | 15  | 5.2852   | 9.7148 | 15  |
| 4        | 6      | 10  | 3.5235   | 6.4765 | 10  |
| 1        | 6      | 7   | 2.4664   | 4.5336 | 7   |
| 2        | 4      | 6   | 2.1141   | 3.8859 | 6   |
| 6        | 10     | 16  | 5.6376   | 10.362 | 16  |
| 4        | 1      | 5   | 1.7617   | 3.2383 | 5   |
| 7        | 4      | 11  | 3.8758   | 7.1242 | 11  |
| 2        | 5      | 7   | 2.4664   | 4.5336 | 7   |
| 1        | 1      | 2   | 0.7047   | 1.2953 | 2   |
| 3        | 3      | 6   | 2.1141   | 3.8859 | 6   |
| 1        | 1      | 2   | 0.7047   | 1.2953 | 2   |
| 2        | 1      | 3   | 1.057    | 1.943  | 3   |
| 2        | 13     | 15  | 5.2852   | 9.7148 | 15  |
| 1        | 4      | 5   | 1.7617   | 3.2383 | 5   |
| 7        | 13     | 20  | 7.047    | 12.953 | 20  |
| 3        | 4      | 7   | 2.4664   | 4.5336 | 7   |
| 0        | 2      | 2   | 0.7047   | 1.2953 | 2   |
| 0        | 7      | 7   | 2.4664   | 4.5336 | 7   |
| 1        | 1      | 2   | 0.7047   | 1.2953 | 2   |
| 105      | 193    | 298 | 105      | 193    | 298 |

p = 0.36 N.S.

| Observed |
|----------|
| D1       |
| 1        |
| 2        |
| 2        |
| 3        |
| 7        |
| 2        |
| 8        |
| 3        |
| 1        |
| 5        |
| 4        |
| 3        |
| 7        |
| 4        |
| 3        |
| 0        |
| 1        |
| 6        |
| 1        |
| 4        |
| 2        |
| 1        |
| 1        |
| 6        |
| 1        |
| 0        |
| 0        |
| 3        |
| 0        |
| 3        |
| 86       |

DE DF DG DH DI DJ DK DL DM DN DO DP DQ DR DS DT DU DV DW DX DY DZ EA EB

| id  | Expected |        |        |        |              | Observed |    |        | Expected |        |        |              | Observed |     |        | Expected |        |        |              | Observed |    |  |
|-----|----------|--------|--------|--------|--------------|----------|----|--------|----------|--------|--------|--------------|----------|-----|--------|----------|--------|--------|--------------|----------|----|--|
|     | non-D1   | SUM    | D1     | non-D1 |              | SUM      | M3 | non-M3 | SUM      | M3     | non-M3 |              | SUM      | D3  | non-D3 | SUM      | D3     | non-D3 |              | SUM      | A3 |  |
| 2   | 3        | 0.8543 | 2.1457 | 3      | <b>D1</b>    | 6        | 11 | 17     | 4.5446   | 12.455 | 17     | <b>D1</b>    | 2        | 15  | 17     | 3.1461   | 13.854 | 17     | <b>D1</b>    | 4        |    |  |
| 9   | 11       | 3.1325 | 7.8675 | 11     | <b>D2</b>    | 1        | 2  | 3      | 0.802    | 2.198  | 3      | <b>D2</b>    | 0        | 3   | 3      | 0.5552   | 2.4448 | 3      | <b>D2</b>    | 1        |    |  |
| 4   | 6        | 1.7086 | 4.2914 | 6      | <b>D3</b>    | 2        | 9  | 11     | 2.9406   | 8.0594 | 11     | <b>D3</b>    | 0        | 6   | 6      | 1.1104   | 4.8896 | 6      | <b>D3</b>    | 4        |    |  |
| 7   | 10       | 2.8477 | 7.1523 | 10     | <b>D4</b>    | 0        | 6  | 6      | 1.604    | 4.396  | 6      | <b>D4</b>    | 1        | 9   | 10     | 1.8506   | 8.1494 | 10     | <b>D4</b>    | 1        |    |  |
| 9   | 16       | 4.5563 | 11.444 | 16     | <b>D5</b>    | 4        | 6  | 10     | 2.6733   | 7.3267 | 10     | <b>D5</b>    | 3        | 13  | 16     | 2.961    | 13.039 | 16     | <b>D5</b>    | 1        |    |  |
| 10  | 12       | 3.4172 | 8.5828 | 12     | <b>L1</b>    | 4        | 12 | 16     | 4.2772   | 11.723 | 16     | <b>L1</b>    | 5        | 7   | 12     | 2.2208   | 9.7792 | 12     | <b>L1</b>    | 3        |    |  |
| 13  | 21       | 5.9801 | 15.02  | 21     | <b>L2</b>    | 2        | 10 | 12     | 3.2079   | 8.7921 | 12     | <b>L2</b>    | 6        | 15  | 21     | 3.8864   | 17.114 | 21     | <b>L2</b>    | 3        |    |  |
| 11  | 14       | 3.9868 | 10.013 | 14     | <b>L3</b>    | 6        | 15 | 21     | 5.6139   | 15.386 | 21     | <b>L3</b>    | 0        | 14  | 14     | 2.5909   | 11.409 | 14     | <b>L3</b>    | 4        |    |  |
| 5   | 6        | 1.7086 | 4.2914 | 6      | <b>L4</b>    | 2        | 12 | 14     | 3.7426   | 10.257 | 14     | <b>L4</b>    | 2        | 4   | 6      | 1.1104   | 4.8896 | 6      | <b>L4</b>    | 3        |    |  |
| 5   | 10       | 2.8477 | 7.1523 | 10     | <b>L5</b>    | 3        | 3  | 6      | 1.604    | 4.396  | 6      | <b>L5</b>    | 3        | 7   | 10     | 1.8506   | 8.1494 | 10     | <b>L5</b>    | 3        |    |  |
| 5   | 9        | 2.5629 | 6.4371 | 9      | <b>L6</b>    | 3        | 7  | 10     | 2.6733   | 7.3267 | 10     | <b>L6</b>    | 2        | 7   | 9      | 1.6656   | 7.3344 | 9      | <b>L6</b>    | 1        |    |  |
| 8   | 11       | 3.1325 | 7.8675 | 11     | <b>L7</b>    | 2        | 7  | 9      | 2.4059   | 6.5941 | 9      | <b>L7</b>    | 10       | 11  | 11     | 2.0357   | 8.9643 | 11     | <b>L7</b>    | 2        |    |  |
| 18  | 25       | 7.1192 | 17.881 | 25     | <b>L8</b>    | 3        | 8  | 11     | 2.9406   | 8.0594 | 11     | <b>L8</b>    | 3        | 22  | 25     | 4.6266   | 20.373 | 25     | <b>L8</b>    | 2        |    |  |
| 11  | 15       | 4.2715 | 10.728 | 15     | <b>A1/A2</b> | 7        | 18 | 25     | 6.6832   | 18.317 | 25     | <b>A1/A2</b> | 4        | 11  | 15     | 2.776    | 12.224 | 15     | <b>A1/A2</b> | 6        |    |  |
| 7   | 10       | 2.8477 | 7.1523 | 10     | <b>A3</b>    | 6        | 9  | 15     | 4.0099   | 10.99  | 15     | <b>A3</b>    | 1        | 9   | 10     | 1.8506   | 8.1494 | 10     | <b>A3</b>    | 3        |    |  |
| 7   | 7        | 1.9934 | 5.0066 | 7      | <b>A4</b>    | 3        | 7  | 10     | 2.6733   | 7.3267 | 10     | <b>A4</b>    | 1        | 6   | 7      | 1.2955   | 5.7045 | 7      | <b>A4</b>    | 1        |    |  |
| 5   | 6        | 1.7086 | 4.2914 | 6      | <b>M1</b>    | 1        | 6  | 7      | 1.8713   | 5.1287 | 7      | <b>M1</b>    | 2        | 4   | 6      | 1.1104   | 4.8896 | 6      | <b>M1</b>    | 1        |    |  |
| 10  | 16       | 4.5563 | 11.444 | 16     | <b>M2</b>    | 2        | 4  | 6      | 1.604    | 4.396  | 6      | <b>M2</b>    | 2        | 14  | 16     | 2.961    | 13.039 | 16     | <b>M2</b>    | 1        |    |  |
| 4   | 5        | 1.4238 | 3.5762 | 5      | <b>M3</b>    | 2        | 3  | 5      | 1.3366   | 3.6634 | 5      | <b>M3</b>    | 2        | 3   | 5      | 0.9253   | 4.0747 | 5      | <b>M3</b>    | 6        |    |  |
| 7   | 11       | 3.1325 | 7.8675 | 11     | <b>M4</b>    | 0        | 11 | 11     | 2.9406   | 8.0594 | 11     | <b>M4</b>    | 0        | 11  | 11     | 2.0357   | 8.9643 | 11     | <b>M4</b>    | 1        |    |  |
| 5   | 7        | 1.9934 | 5.0066 | 7      | <b>I1</b>    | 0        | 7  | 7      | 1.8713   | 5.1287 | 7      | <b>I1</b>    | 2        | 5   | 7      | 1.2955   | 5.7045 | 7      | <b>I1</b>    | 2        |    |  |
| 1   | 2        | 0.5695 | 1.4305 | 2      | <b>I2</b>    | 1        | 1  | 2      | 0.5347   | 1.4653 | 2      | <b>I2</b>    | 2        | 0   | 2      | 0.3701   | 1.6299 | 2      | <b>I2</b>    | 3        |    |  |
| 5   | 6        | 1.7086 | 4.2914 | 6      | <b>I3</b>    | 4        | 2  | 6      | 1.604    | 4.396  | 6      | <b>I3</b>    | 1        | 5   | 6      | 1.1104   | 4.8896 | 6      | <b>I3</b>    | 1        |    |  |
| 1   | 2        | 0.5695 | 1.4305 | 2      | <b>I4</b>    | 0        | 2  | 2      | 0.5347   | 1.4653 | 2      | <b>I4</b>    | 0        | 2   | 2      | 0.3701   | 1.6299 | 2      | <b>I4</b>    | 2        |    |  |
| 1   | 3        | 0.8543 | 2.1457 | 3      | <b>I5</b>    | 1        | 2  | 3      | 0.802    | 2.198  | 3      | <b>I5</b>    | 0        | 3   | 3      | 0.5552   | 2.4448 | 3      | <b>I5</b>    | 1        |    |  |
| 13  | 15       | 4.2715 | 10.728 | 15     | <b>I6</b>    | 1        | 2  | 2      | 0.5347   | 1.4653 | 2      | <b>I6</b>    | 0        | 3   | 3      | 0.5552   | 2.4448 | 3      | <b>I6</b>    | 2        |    |  |
| 5   | 5        | 1.4238 | 3.5762 | 5      | <b>V1</b>    | 4        | 11 | 15     | 4.0099   | 10.99  | 15     | <b>V1</b>    | 2        | 13  | 15     | 2.776    | 12.224 | 15     | <b>V1</b>    | 3        |    |  |
| 14  | 20       | 5.6954 | 14.305 | 20     | <b>V2</b>    | 1        | 4  | 5      | 1.3366   | 3.6634 | 5      | <b>V2</b>    | 1        | 4   | 5      | 0.9253   | 4.0747 | 5      | <b>V2</b>    | 0        |    |  |
| 6   | 7        | 1.9934 | 5.0066 | 7      | <b>V3</b>    | 6        | 14 | 20     | 5.3465   | 14.653 | 20     | <b>V3</b>    | 3        | 4   | 7      | 1.2955   | 5.7045 | 7      | <b>V3</b>    | 7        |    |  |
| 2   | 2        | 0.5695 | 1.4305 | 2      | <b>V4</b>    | 2        | 5  | 7      | 1.8713   | 5.1287 | 7      | <b>V4</b>    | 0        | 2   | 2      | 0.3701   | 1.6299 | 2      | <b>V4</b>    | 3        |    |  |
| 4   | 7        | 1.9934 | 5.0066 | 7      | <b>V5</b>    | 2        | 5  | 7      | 1.8713   | 5.1287 | 7      | <b>V5</b>    | 1        | 6   | 7      | 1.2955   | 5.7045 | 7      | <b>V5</b>    | 0        |    |  |
| 2   | 2        | 0.5695 | 1.4305 | 2      | <b>V6</b>    | 1        | 1  | 2      | 0.5347   | 1.4653 | 2      | <b>V6</b>    | 0        | 2   | 2      | 0.3701   | 1.6299 | 2      | <b>V6</b>    | 3        |    |  |
| 216 | 302      | 86     | 216    | 302    | <b>V8</b>    | 1        | 1  | 2      | 0.5347   | 1.4653 | 2      | <b>V8</b>    | 57       | 251 | 308    | 57       | 251    | 308    | <b>V8</b>    | 1        |    |  |

p = 0.85 N.S.

p = 0.82 N.S.

p = 0.31 N.S.

EC ED EE EF EG EH EI EJ EK EL EM EN EO EP EQ ER ES ET EU EV EW EX EY EZ FA

| id  | Expected |        |        |        | D1    | Observed |     | Expected |        |        |        | D1    | Observed |     |        | Expected |        |        | D1    | Observed |     |
|-----|----------|--------|--------|--------|-------|----------|-----|----------|--------|--------|--------|-------|----------|-----|--------|----------|--------|--------|-------|----------|-----|
|     | non-A3   | SUM    | A3     | non-A3 |       | SUM      | L6  | non-L6   | SUM    | L6     | non-L6 |       | SUM      | L1  | non-L1 | SUM      | L1     | non-L1 |       | SUM      | V3  |
| 13  | 17       | 4.3618 | 12.638 | 17     | D1    | 5        | 12  | 17       | 2.6958 | 14.304 | 17     | D1    | 7        | 10  | 17     | 4.4884   | 12.512 | 17     | D1    | 6        | 11  |
| 2   | 3        | 0.7697 | 2.2303 | 3      | D2    | 1        | 2   | 3        | 0.4757 | 2.5243 | 3      | D2    | 2        | 1   | 3      | 0.7921   | 2.2079 | 3      | D2    | 0        | 3   |
| 7   | 11       | 2.8224 | 8.1776 | 11     | D3    | 3        | 8   | 11       | 1.7443 | 9.2557 | 11     | D3    | 3        | 8   | 11     | 2.9043   | 8.0957 | 11     | D3    | 4        | 7   |
| 5   | 6        | 1.5395 | 4.4605 | 6      | D4    | 2        | 4   | 6        | 0.9515 | 5.0485 | 6      | D4    | 2        | 4   | 6      | 1.5842   | 4.4158 | 6      | D4    | 1        | 5   |
| 9   | 10       | 2.5658 | 7.4342 | 10     | D5    | 1        | 9   | 10       | 1.5858 | 8.4142 | 10     | D5    | 3        | 7   | 10     | 2.6403   | 7.3597 | 10     | D5    | 3        | 7   |
| 13  | 16       | 4.1053 | 11.895 | 16     | L1    | 3        | 13  | 16       | 2.5372 | 13.463 | 16     | L1    | 3        | 13  | 16     | 3.6964   | 10.304 | 16     | L1    | 5        | 11  |
| 9   | 12       | 3.0789 | 8.9211 | 12     | L2    | 0        | 12  | 12       | 1.9029 | 10.097 | 12     | L2    | 4        | 8   | 12     | 3.1683   | 8.8317 | 12     | L2    | 4        | 8   |
| 17  | 21       | 5.3882 | 15.612 | 21     | L3    | 3        | 18  | 21       | 3.3301 | 17.67  | 21     | L3    | 5        | 16  | 21     | 5.5446   | 15.455 | 21     | L3    | 7        | 14  |
| 11  | 14       | 3.5921 | 10.408 | 14     | L4    | 1        | 13  | 14       | 2.2201 | 11.78  | 14     | L4    | 3        | 11  | 14     | 3.6964   | 10.304 | 14     | L4    | 5        | 9   |
| 3   | 6        | 1.5395 | 4.4605 | 6      | L5    | 1        | 5   | 6        | 0.9515 | 5.0485 | 6      | L5    | 2        | 4   | 6      | 1.5842   | 4.4158 | 6      | L5    | 3        | 3   |
| 9   | 10       | 2.5658 | 7.4342 | 10     | L6    | 3        | 7   | 10       | 2.6403 | 7.3597 | 10     | L6    | 3        | 7   | 10     | 2.6403   | 7.3597 | 10     | L6    | 1        | 9   |
| 7   | 9        | 2.3092 | 6.6908 | 9      | L7    | 4        | 5   | 9        | 1.4272 | 7.5728 | 9      | L7    | 4        | 5   | 9      | 2.3762   | 6.6238 | 9      | L7    | 1        | 8   |
| 9   | 11       | 2.8224 | 8.1776 | 11     | L8    | 2        | 9   | 11       | 1.7443 | 9.2557 | 11     | L8    | 4        | 7   | 11     | 2.9043   | 8.0957 | 11     | L8    | 2        | 9   |
| 19  | 25       | 6.4145 | 18.586 | 25     | A1/A2 | 2        | 23  | 25       | 3.9644 | 21.036 | 25     | A1/A2 | 7        | 18  | 25     | 6.6007   | 18.399 | 25     | A1/A2 | 12       | 13  |
|     |          |        |        |        | A3    | 1        | 14  | 15       | 2.3786 | 12.621 | 15     | A3    | 3        | 12  | 15     | 3.9604   | 11.04  | 15     | A3    | 7        | 8   |
| 7   | 10       | 2.5658 | 7.4342 | 10     | A4    | 3        | 7   | 10       | 1.5858 | 8.4142 | 10     | A4    | 2        | 8   | 10     | 2.6403   | 7.3597 | 10     | A4    | 5        | 5   |
| 6   | 7        | 1.7961 | 5.2039 | 7      | M1    | 0        | 7   | 7        | 1.11   | 5.89   | 7      | M1    | 2        | 5   | 7      | 1.8482   | 5.1518 | 7      | M1    | 4        | 3   |
| 5   | 6        | 1.5395 | 4.4605 | 6      | M2    | 2        | 4   | 6        | 0.9515 | 5.0485 | 6      | M2    | 3        | 3   | 6      | 1.5842   | 4.4158 | 6      | M2    | 1        | 5   |
| 10  | 16       | 4.1053 | 11.895 | 16     | M3    | 3        | 13  | 16       | 2.5372 | 13.463 | 16     | M3    | 4        | 12  | 16     | 4.2244   | 11.776 | 16     | M3    | 6        | 10  |
| 4   | 5        | 1.2829 | 3.7171 | 5      | M4    | 0        | 5   | 5        | 0.7929 | 4.2071 | 5      | M4    | 1        | 4   | 5      | 1.3201   | 3.6799 | 5      | M4    | 2        | 3   |
| 9   | 11       | 2.8224 | 8.1776 | 11     | I1    | 2        | 9   | 11       | 1.7443 | 9.2557 | 11     | I1    | 1        | 10  | 11     | 2.9043   | 8.0957 | 11     | I1    | 2        | 9   |
| 4   | 7        | 1.7961 | 5.2039 | 7      | I2    | 1        | 6   | 7        | 1.11   | 5.89   | 7      | I2    | 1        | 6   | 7      | 1.8482   | 5.1518 | 7      | I2    | 4        | 3   |
| 1   | 2        | 0.5132 | 1.4868 | 2      | I3    | 1        | 1   | 2        | 0.3172 | 1.6828 | 2      | I3    | 0        | 2   | 2      | 0.5281   | 1.4719 | 2      | I3    | 1        | 1   |
| 4   | 6        | 1.5395 | 4.4605 | 6      | I4    | 1        | 5   | 6        | 0.9515 | 5.0485 | 6      | I4    | 1        | 5   | 6      | 1.5842   | 4.4158 | 6      | I4    | 2        | 4   |
| 1   | 2        | 0.5132 | 1.4868 | 2      | I5    | 0        | 2   | 2        | 0.3172 | 1.6828 | 2      | I5    | 0        | 2   | 2      | 0.5281   | 1.4719 | 2      | I5    | 1        | 1   |
| 1   | 3        | 0.7697 | 2.2303 | 3      | I6    | 0        | 3   | 3        | 0.4757 | 2.5243 | 3      | I6    | 1        | 2   | 3      | 0.7921   | 2.2079 | 3      | I6    | 1        | 2   |
| 12  | 15       | 3.8487 | 11.151 | 15     | V1    | 2        | 13  | 15       | 2.3786 | 12.621 | 15     | V1    | 5        | 10  | 15     | 3.9604   | 11.04  | 15     | V1    | 3        | 12  |
| 5   | 5        | 1.2829 | 3.7171 | 5      | V2    | 0        | 5   | 5        | 0.7929 | 4.2071 | 5      | V2    | 0        | 5   | 5      | 1.3201   | 3.6799 | 5      | V2    | 3        | 2   |
| 13  | 20       | 5.1316 | 14.868 | 20     | V3    | 1        | 19  | 20       | 3.1715 | 16.828 | 20     | V3    | 5        | 15  | 20     | 5.2805   | 14.719 | 20     | V3    |          |     |
| 4   | 7        | 1.7961 | 5.2039 | 7      | V4    | 1        | 6   | 7        | 1.11   | 5.89   | 7      | V4    | 0        | 7   | 7      | 1.8482   | 5.1518 | 7      | V4    | 1        | 6   |
| 2   | 2        | 0.5132 | 1.4868 | 2      | V5    | 0        | 2   | 2        | 0.3172 | 1.6828 | 2      | V5    | 0        | 2   | 2      | 0.5281   | 1.4719 | 2      | V5    | 0        | 2   |
| 4   | 7        | 1.7961 | 5.2039 | 7      | V6    | 3        | 4   | 7        | 1.11   | 5.89   | 7      | V6    | 2        | 5   | 7      | 1.8482   | 5.1518 | 7      | V6    | 3        | 4   |
| 1   | 2        | 0.5132 | 1.4868 | 2      | V8    | 0        | 2   | 2        | 0.3172 | 1.6828 | 2      | V8    | 0        | 2   | 2      | 0.5281   | 1.4719 | 2      | V8    | 1        | 1   |
| 226 | 304      | 78     | 226    | 304    |       | 49       | 260 | 309      | 49     | 260    | 309    |       | 80       | 223 | 303    | 80       | 223    | 303    |       | 101      | 198 |

p = 0.93 N.S.

p = 0.47 N.S.

p = 0.95 N.S.

**FB FC FD FE FF FG FH FI FJ FK FL FM**

| Expected |        |        |     | Observed     |    |        | Expected |         |         |     |
|----------|--------|--------|-----|--------------|----|--------|----------|---------|---------|-----|
| SUM      | V3     | non-V3 | SUM |              | V1 | non-V1 | SUM      | V1      | non-V1  | SUM |
| 17       | 5.7425 | 11.258 | 17  | <b>D1</b>    | 2  | 15     | 17       | 3.91447 | 13.0855 | 17  |
| 3        | 1.0134 | 1.9866 | 3   | <b>D2</b>    | 1  | 2      | 3        | 0.69079 | 2.30921 | 3   |
| 11       | 3.7157 | 7.2843 | 11  | <b>D3</b>    | 2  | 9      | 11       | 2.53289 | 8.46711 | 11  |
| 6        | 2.0268 | 3.9732 | 6   | <b>D4</b>    | 2  | 4      | 6        | 1.38158 | 4.61842 | 6   |
| 10       | 3.3779 | 6.6221 | 10  | <b>D5</b>    | 5  | 5      | 10       | 2.30263 | 7.69737 | 10  |
| 16       | 5.4047 | 10.595 | 16  | <b>L1</b>    | 5  | 11     | 16       | 3.68421 | 12.3158 | 16  |
| 12       | 4.0535 | 7.9465 | 12  | <b>L2</b>    | 4  | 8      | 12       | 2.76316 | 9.23684 | 12  |
| 21       | 7.0936 | 13.906 | 21  | <b>L3</b>    | 2  | 19     | 21       | 4.83553 | 16.1645 | 21  |
| 14       | 4.7291 | 9.2709 | 14  | <b>L4</b>    | 5  | 9      | 14       | 3.22368 | 10.7763 | 14  |
| 6        | 2.0268 | 3.9732 | 6   | <b>L5</b>    | 0  | 6      | 6        | 1.38158 | 4.61842 | 6   |
| 10       | 3.3779 | 6.6221 | 10  | <b>L6</b>    | 2  | 8      | 10       | 2.30263 | 7.69737 | 10  |
| 9        | 3.0401 | 5.9599 | 9   | <b>L7</b>    | 3  | 6      | 9        | 2.07237 | 6.92763 | 9   |
| 11       | 3.7157 | 7.2843 | 11  | <b>L8</b>    | 3  | 8      | 11       | 2.53289 | 8.46711 | 11  |
| 25       | 8.4448 | 16.555 | 25  | <b>A1/A2</b> | 6  | 19     | 25       | 5.75658 | 19.2434 | 25  |
| 15       | 5.0669 | 9.9331 | 15  | <b>A3</b>    | 3  | 12     | 15       | 3.45395 | 11.5461 | 15  |
| 10       | 3.3779 | 6.6221 | 10  | <b>A4</b>    | 2  | 8      | 10       | 2.30263 | 7.69737 | 10  |
| 7        | 2.3645 | 4.6355 | 7   | <b>M1</b>    | 2  | 5      | 7        | 1.61184 | 5.38816 | 7   |
| 6        | 2.0268 | 3.9732 | 6   | <b>M2</b>    | 0  | 6      | 6        | 1.38158 | 4.61842 | 6   |
| 16       | 5.4047 | 10.595 | 16  | <b>M3</b>    | 4  | 12     | 16       | 3.68421 | 12.3158 | 16  |
| 5        | 1.689  | 3.311  | 5   | <b>M4</b>    | 0  | 5      | 5        | 1.15132 | 3.84868 | 5   |
| 11       | 3.7157 | 7.2843 | 11  | <b>I1</b>    | 3  | 8      | 11       | 2.53289 | 8.46711 | 11  |
| 7        | 2.3645 | 4.6355 | 7   | <b>I2</b>    | 1  | 6      | 7        | 1.61184 | 5.38816 | 7   |
| 2        | 0.6756 | 1.3244 | 2   | <b>I3</b>    | 0  | 2      | 2        | 0.46053 | 1.53947 | 2   |
| 6        | 2.0268 | 3.9732 | 6   | <b>I4</b>    | 3  | 3      | 6        | 1.38158 | 4.61842 | 6   |
| 2        | 0.6756 | 1.3244 | 2   | <b>I5</b>    | 0  | 2      | 2        | 0.46053 | 1.53947 | 2   |
| 3        | 1.0134 | 1.9866 | 3   | <b>I6</b>    | 0  | 3      | 3        | 0.69079 | 2.30921 | 3   |
| 15       | 5.0669 | 9.9331 | 15  | <b>V1</b>    |    |        |          |         |         |     |
| 5        | 1.689  | 3.311  | 5   | <b>V2</b>    | 0  | 5      | 5        | 1.15132 | 3.84868 | 5   |
|          |        |        |     | <b>V3</b>    | 3  | 17     | 20       | 4.60526 | 15.3947 | 20  |
| 7        | 2.3645 | 4.6355 | 7   | <b>V4</b>    | 3  | 4      | 7        | 1.61184 | 5.38816 | 7   |
| 2        | 0.6756 | 1.3244 | 2   | <b>V5</b>    | 2  | 0      | 2        | 0.46053 | 1.53947 | 2   |
| 7        | 2.3645 | 4.6355 | 7   | <b>V6</b>    | 2  | 5      | 7        | 1.61184 | 5.38816 | 7   |
| 2        | 0.6756 | 1.3244 | 2   | <b>V8</b>    | 0  | 2      | 2        | 0.46053 | 1.53947 | 2   |
| 299      | 101    | 198    | 299 |              | 70 | 234    | 304      | 70      | 234     | 304 |

p = 0.8

p = 0.42
